# Supplementary material for: Bilateral Transplantation of Allogenic Adult Human Bone Marrow-Derived Mesenchymal Stem Cells into the Subventricular Zone of Parkinson’s Disease: A Pilot Clinical Study
Source: Hindawi journal article supplement (doi:10.1155/2012/931902), 2012-01-01
Supplement: f1 [file 931902.f1.doc]

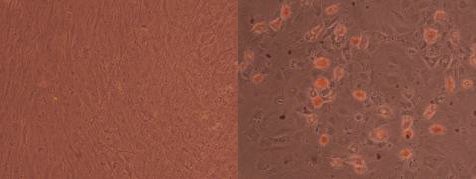


A: Control MSC Adipocyte


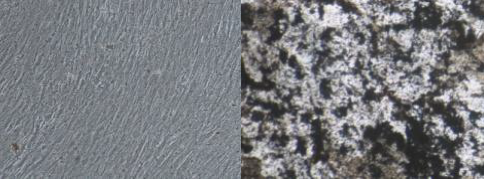


B: Control MSC Osteoblast


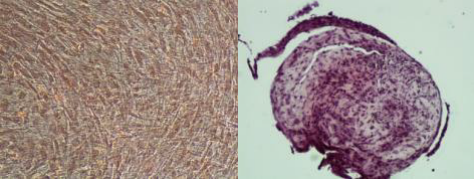


C: Control MSC Chondrocyte

**Suppl Figure 1**: Illustrates the trilneage differentiation of BM-MSCs into A. adipocytes stained using Oil Red O, B. osteoblasts stained with Von Kossa and C. chondrocytes stained with Safranin O using standard inducing agents. The panel on the left hand side shows the negative control of BM-MSCs stained, respectively.


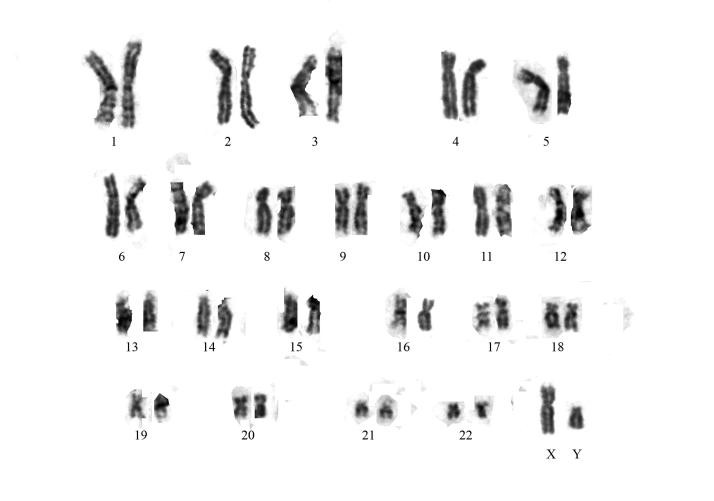


**Suppl Figure 2**: Represents the karyotype of a healthy normal male bone marrow donor mesenchymal stem cells used for allogenic transplantation in PD patients this study. (Supplementary data)


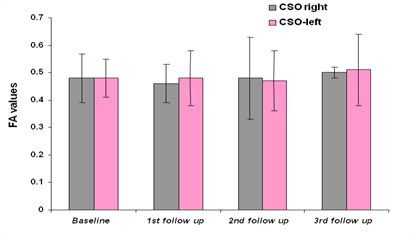

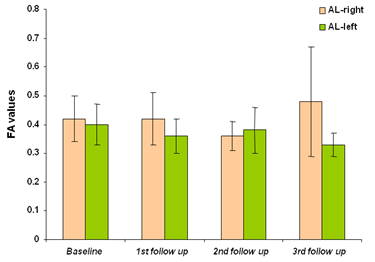


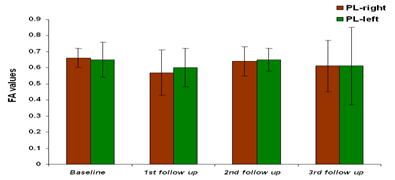

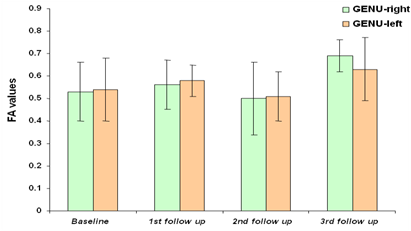


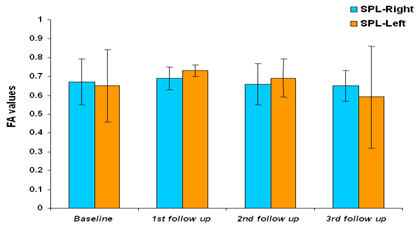

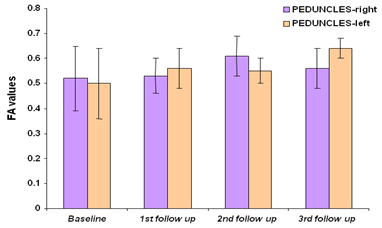


**Suppl Figure 3.** MR tractography: (a) average ± SD of Levels of fractional anisotropic values (FA) in 12 diﬀerent sites in brain of PD patients.
